1 **Title: Young Maternal Age at first birth and Child**  
2 **Undernutrition in Bangladesh: Evidence from the**  
3 **Bangladesh Demographic Health Survey 2017-18**

4  
5 **Short title: Maternal Age at first birth and Child Undernutrition**

6  
7 **Authors:**

8  
9 Md. Alamgir Hossain<sup>1\*</sup>, Md. Tariqujjaman<sup>2</sup>, Novel Chandra Das<sup>3</sup>, Rubaiya Matin Chandrima<sup>1</sup>,  
10 S.M Hasibul Islam<sup>1</sup>, Ahmed Ehsanur Rahman<sup>1</sup>, Hassan Rushekh Mahmood<sup>1</sup>, Aniq Tasnim  
11 Hossain<sup>1</sup>

12  
13 **Author's Affiliations**

14 <sup>1</sup>Maternal and Child Health Division (MCHD), icddr,b, GPO Box 128, Dhaka, Bangladesh

15 <sup>2</sup>Nutrition Research Division (NRD), icddr,b, GPO Box 128, Dhaka, Bangladesh

16 <sup>3</sup>Health System and Population Studies Division (HSPSD), icddr,b, GPO Box 128, Dhaka,  
17 Bangladesh

18

19

20

21 **Corresponding author**

22 \*alamgir.hossain@icddr.org (MAH)

23

## 24 Abstract

25 **Background:** Childhood undernutrition is a serious public health issue that includes stunting,  
26 wasting, and underweight. In Bangladesh, many adolescent girls become mothers early. Giving  
27 birth at a young age is common, adversely affecting maternal health and child undernutrition.  
28 This study investigated the association between maternal age at first birth and undernutrition of  
29 under-five children in Bangladesh.

30 **Methods:** The study is cross-sectional and data was collected from BDHS 2017–18 survey.  
31 Mothers who were pregnant at the age of  $\leq 19$  years were regarded as young mothers and aged  
32  $>19$  years were regarded as adult mothers. Children were categorized as stunting (height for age),  
33 wasting (weight for height), and underweight (weight for age) based on the z-scores  $-2$  as per  
34 WHO median growth guidelines. Multivariate logistic regression was employed to assess the  
35 association.

36 **Results:** This study revealed that 71.5% of mothers had their first child before 19 years old. The  
37 undernutrition status of the children of younger mothers and the children of adult mothers  
38 differed significantly, stunted ( $p < 0.001$ ), wasted ( $p < 0.001$ ), and underweight ( $p < 0.001$ ).  
39 Children of mothers aged under 19 years at their 1st childbirth were 1.4 times more likely to be  
40 stunted [Adjusted odds ratio (AOR): 1.4, 95% CI: 1.02- 2.46;  $p = 0.008$ ], 1.6 times more likely to  
41 be wasted (AOR: 1.6; 95% CI: 1.09-1.78;  $p = 0.039$ ), 1.5 times more likely to be underweight  
42 (AOR: 1.5, 95% CI: 1.15-2.07;  $p = 0.004$ ) compared to children of mothers who are adults.

43 **Conclusion:** This research will draw attention to the policymakers taking the necessary  
44 initiatives focus on the maternal age at the time of first birth, which will help reduce all forms of  
45 undernutrition in under-five children.

46 **Keywords:** Young mother, Stunting, Wasting, underweight, undernutrition, Bangladesh

## 47 **Background**

48 Undernutrition is the term that refers to a person's inability to meet their needs to maintain good  
49 health (1). Adequate nutrition is helpful for growth and progress but malnutrition threatens  
50 human life (2). Globally, in 2020, 45 million under-five children were wasted and 150 million  
51 were stunted (3) and 47 million were underweight (4). In low and middle-income countries  
52 (LMICs), childhood undernutrition which includes stunting, wasting, and underweight, is a  
53 serious public health issue. In LMICs, undernutrition is a factor in about 45% of under-five  
54 fatalities. (3). In South Asia; the prevalence of undernutrition is 15.7% (5); 8.2% were wasted,  
55 and 27.4% were stunted (6). Bangladesh made some progress on the prevalence of stunting  
56 (31%) (7), but this is still higher than the average (21.8%) for the Asian region (8). In  
57 Bangladesh, the prevalence of wasting (9.8%), but this is still higher than the average for the  
58 Asian region (8.9%) (8), and 21.9% are underweight in Bangladesh (7, 8).

59 Globally, around 1.8 million children die each year due to stunting and wasting, and 12% of the  
60 years are adjusted for disability (9). Undernutrition in childhood is a factor that affected  
61 cognitive development and causes brain damage, harming children's motor development and  
62 investigative behavior (10). Undernutrition in children has been associated with atypical  
63 behavior, low academic performance, and mental retardation (11).

64 Young mothers are at risk of giving birth to undernourished children (12). The age at first birth  
65 refers to the percentage of mothers giving birth at certain ages. In this context, "young mother"  
66 refers to becoming a mother between the ages of 10-19 years (13). Women aged 15-19 who have  
67 given birth their first child are taken into account as per BDHS-17/18 (7). In LMICs, it is  
68 anticipated that per year 21 million of mothers aged between fifteen to nineteen become  
69 pregnant, and 12 million give birth (14). In South Asia, about one in two adolescent girls married

70 before the age of eighteen and one in five girls give delivery before their eighteen years (15). As  
71 per the world bank, 37% of girls married before their eighteen years, and that impacted child  
72 mortality and nutrition (16). In Bangladesh, sixty-six percent of women gave birth before age  
73 twenty (7). Young mothers often suffer from abortion, ectopic pregnancy, miscarriage, maternal  
74 infections and obstructed labor (17). Birth outcomes of adolescent mothers are born with  
75 stillbirth, low birthweight, preterm birth, child mortality, severe neonatal conditions, birth  
76 injuries, and retarded growth (18-21).

77 In developing countries, young pregnancies mostly happened in economic insolvency, with less  
78 education, and among the rural population (22, 23). Approximately 71% of new mothers start  
79 breastfeeding, but due to labor and delivery problems, and low social support breastfeeding  
80 initiation was hampered (24). Adolescent mothers are less likely to get immunized, obtain  
81 regular health care, overfeed and underfeed their infants, and introduce solid early and  
82 inadequate nursing to their offspring (18, 25). Deaths of live newborns are fifty percent higher  
83 among babies of young mothers compared to mothers aged 20-29 years (22). The young mother  
84 requires special attention as she is at risk of adverse health outcomes rather than the older (26). A  
85 prospective study found that young mothers' age ( $\leq 19$  years) was associated with infants' low  
86 birth weight, preterm birth, stunting, and failure of completing secondary school to the child  
87 (27). In developing countries, maternal and child undernutrition is caused by several factors,  
88 including a lack of suitable feeding habits for babies and young children (28). Even though the  
89 government has taken steps to discourage young marriage, it is yet common in rural and  
90 underprivileged areas. Early marriage influences becoming a mother at a premature age.

91 However, as per our knowledge no studies explored the association between young maternal age  
92 at their first birth and undernutrition in children in Bangladesh. We aimed to investigate maternal

93 age at first birth and child undernutrition in Bangladesh using nationally representative cross-  
94 sectional health surveys (BDHS-17/18) data.

## 95 **Methodology**

### 96 **Data source**

97 Data extracted from the Bangladesh Demographic and Health Survey (BDHS)-2017/18. The  
98 two-stage stratified sample design used in the BDHS survey across all administrative divisions.  
99 Every division is further subdivided into zilas and every zila into upazilas. Subdivisions of the  
100 upazila serve as the main sample units (enumeration areas, EAs), wards and mohallas in urban  
101 areas, unions and mouzas in rural areas. EAs were chosen in the initial step with probability  
102 based on size. A sampling frame for the second step of household selection was created by  
103 completing a household listing operation in each selected EAs. An average of 30 households per  
104 EA were chosen in a systematic random sample during the second sampling step. The BDHS  
105 provides essential mother and child health, and nutrition information that represented at the  
106 national and divisional levels (7, 29).

### 107 **Samples**

108 Child anthropometric measurements were the key outcome factors. Enumerators measured  
109 weight, height, and length using the internationally accepted standard protocol. Each child has  
110 measured height for age, weight for height, and weight for age to calculate Z-scores for  
111 comparison to the age and gender-appropriate child growth guidelines of WHO (30).  
112 After requesting permission from the DHS program, datasets were downloaded from the DHS  
113 website. After excluding missing data, height limits and flagged cases (inconsistent, irrelevant  
114 and not applicable response etc), absence for height and weight measurement, and deaths, finally

115 7,643 children were included in this study (Fig. 1). Detailed information on the survey (such as  
116 the sampling method, the determination of the sample size, and the data collection procedure) is  
117 described in the BDHS 2017-18 report (7).

118 This study considers the maternal age at first birth as the primary exposure variable. We divided  
119 the ages of the mothers at their first birth into  $\leq 19$  and  $> 19$  years. To evaluate the link between  
120 maternal age at the time of the first birth and undernutrition in children. In addition, we took into  
121 account the mothers' age ( $\leq 19$  years, and  $> 19$  years), the household head (mother, husband,  
122 father, fathers-in-law, and others), the mothers' body mass index (BMI) [underweight, normal  
123 weight, and overweight and obese (BMI 25-  $> 29.9$  kg/m<sup>2</sup>)], the age group of the children ( $\leq 24$   
124 months,  $> 24$  months), the delivery by cesarean section (yes, no), the mothers' education ( (yes,  
125 no).

## 126 Statistical analysis

127 The statistical program Stata (version 15) was used to analyze the data. Descriptive statistics  
128 were calculated and reported in percentages and weighted percentages. The bivariate analysis  
129 used the chi-square test to assess the significant associated factors of childhood undernutrition.  
130 Finally, after adjusting potential confounders, the association between undernutrition in under-  
131 five children and the mother's age at first birth was examined using multiple logistic regression  
132 analysis.

## 133 Ethical consideration

134 DHS data are publicly available upon justifiable request and are in the public domain. We did  
135 not need further ethical approval because the study protocol was accepted by both the  
136 Bangladeshi Ethics Commission and ICF International (7).

## 137 Results

### 138 Socio-demographic characteristics

139 About 72% of mothers' age at first birth was below 19 years, 56.3% of household head was  
140 husband, 60.5% of women were of normal weight. About 50% of mothers completed secondary  
141 education, whereas 33.3% of fathers completed primary education. In the wealth index, we found  
142 that the distributions of poorer (20.4%) and richer (20.3%) and rest are almost similar. About  
143 35% of mothers delivered babies by C-section. 15.7% of children were under 2500g at birth, and  
144 40.2% of mothers were employed at the time of data collection (Table 1).

### 145 Nutritional status of children

146 Stunting, wasting, and underweight were all common, with prevalence rates of 31%, 8%, and  
147 22%, respectively (Figure 2). In a chi-square test, it was found that young mothers' first-born  
148 children had different nutritional statuses from those of adult mothers in terms of underweight  
149 ( $p<0.001$ ), stunted ( $p<0.001$ ), and wasted ( $p=0.008$ ). The chi-square test revealed a significant  
150 association between child undernutrition and the household head wasted ( $p=0.017$ ), stunted  
151 ( $p<0.001$ ), underweight ( $p<0.001$ ), the father's education wasted ( $p=0.013$ ), stunted ( $p<0.001$ ),  
152 underweight ( $p<0.001$ ), and cesarean delivery ( $p=0.006$ ), wasted ( $p<0.001$ ), stunted ( $p<0.001$ ),  
153 underweight ( $p<0.001$ ). Antenatal care visits four times were found to be effective in preventing  
154 stunting ( $p<0.001$ ) and underweight ( $p<0.001$ ) and but not significant for preventing wasting  
155 ( $p=0.226$ ) (Table 2).

### 156 Relationship between mothers' age during their first delivery and 157 children's undernutrition

158 Multiple logistic regression models are used to analyze the data, after adjusting for potential  
 159 confounders such as household head type, antenatal care (ANC), childbirth weight, and the  
 160 respondents' current employment. In the regression model, AOR =1.6, 95% CI 1.09-2.46 were  
 161 found to be 1.6 times more likely to be wasted, AOR =1.4, 95% CI 1.09-1.78 were found to be  
 162 1.4 times more likely to be stunted, and AOR =1.5, 95% CI 1.15-2.07 were found to be 1.5 times  
 163 more likely to be underweight of children born to mothers aged less than nineteen years  
 164 compared to mothers aged more than nineteen years (Table 3).

165

166 Table-1: Distribution of background characteristics, presented as number and percentage

| Characteristics                                          | Un-weighted percent | Weighted percent |
|----------------------------------------------------------|---------------------|------------------|
| <b>Age of mothers at their 1<sup>st</sup> childbirth</b> |                     |                  |
| ≤ 19 years                                               | 5,356 (70.1)        | 71.5             |
| > 19 years                                               | 2,287 (29.9)        | 28.5             |
| <b>Mother's BMI</b>                                      |                     |                  |
| Underweight                                              | 1,128 (14.8)        | 13.9             |
| Normal weight                                            | 4,543 (59.5)        | 60.5             |
| Overweight/<br>Obese                                     | 1,972 (25.7)        | 25.6             |
| <b>Mother's education</b>                                |                     |                  |
| No education                                             | 537 (7.0)           | 7.0              |
| Primary                                                  | 2,209 (28.9)        | 28.6             |
| Secondary                                                | 3,619 (47.4)        | 49.0             |
| Higher                                                   | 1,278 (16.7)        | 15.4             |



|                                     |              |      |
|-------------------------------------|--------------|------|
| <b>Antenatal care (ANC) visits</b>  |              |      |
| ≤4 times visit                      | 2,886 (63.7) | 64.5 |
| <b>Delivery by cesarean section</b> |              |      |
| No c-section                        | 3,154 (66.8) | 66.7 |
| <b>Household head</b>               |              |      |
| Self                                | 528 (6.9)    | 7.6  |
| Husband                             | 4,397 (57.5) | 56.3 |
| Father                              | 885 (11.6)   | 11.9 |
| Fathers-in-law                      | 1,432 (18.7) | 19.3 |
| Others                              | 401 (5.3)    | 4.9  |
| <b>Father's education</b>           |              |      |
| No education                        | 1,140 (14.9) | 14.9 |
| Primary                             | 2,630 (34.4) | 34.7 |
| Secondary                           | 2,473 (32.4) | 33.3 |
| Higher                              | 1,400 (18.3) | 17.1 |
| <b>Wealth index</b>                 |              |      |
| Poorest                             | 1,709 (22.4) | 21.8 |
| Poorer                              | 1,544 (20.2) | 20.4 |
| Middle                              | 1,377 (18.0) | 19.1 |
| Richer                              | 1,528 (20.0) | 20.3 |
| Richest                             | 1,485 (19.4) | 18.4 |
| <b>Respondent currently working</b> |              |      |
| Yes                                 | 3,089 (40.4) | 40.2 |
| <b>Birth weight of children</b>     |              |      |
| <2500 gm                            | 328 (15.4)   | 15.7 |

|                                           |              |      |
|-------------------------------------------|--------------|------|
| ≥ 2500 gm                                 | 1,808 (84.6) | 84.3 |
| <b>The age group of children (months)</b> |              |      |
| ≤ 24 (months)                             | 3,253 (42.6) | 42.6 |
| <b>Sex of children</b>                    |              |      |
| Male child                                | 3,985 (52.1) | 52.2 |

167

168 Table 2: Association of background characteristics and child undernutrition

| Variable                           | Wasted     |         | Stunted     |         | Underweighted |         |
|------------------------------------|------------|---------|-------------|---------|---------------|---------|
|                                    | Number (%) | P-value | Number (%)  | P-value | Number (%)    | P-value |
| <b>Mothers' age at first birth</b> |            |         |             |         |               |         |
| ≤19 years                          | 483 (9.0)  | 0.008*  | 1805 (33.7) | <0.001* | 1271 (23.7)   | <0.001* |
| >19 years                          | 164 (7.2)  |         | 587 (25.7)  |         | 425 (18.6)    |         |
| <b>Mother's BMI</b>                |            |         |             |         |               |         |
| Underweight                        | 158 (14.0) | <0.001* | 474 (42.0)  | <0.001* | 373 (33.1)    | <0.001* |
| Normal weight                      | 366 (8.1)  |         | 1471 (32.4) |         | 1018 (22.4)   |         |
| Overweight and Obese               | 123 (10.7) |         | 447 (42.5)  |         | 305 (28.0)    |         |
| <b>Mother's education</b>          |            |         |             |         |               |         |
| No education                       | 66 (12.3)  | <0.001* | 244 (45.4)  | <0.001* | 198 (36.9)    | <0.001* |
| Primary                            | 198 (8.9)  |         | 872 (39.5)  |         | 612 (27.7)    |         |
| Secondary                          | 308 (8.5)  |         | 1085 (30.0) |         | 752 (20.8)    |         |

|                                                       |             |        |             |         |             |         |
|-------------------------------------------------------|-------------|--------|-------------|---------|-------------|---------|
| Higher                                                | 75 (5.9)    |        | 191 (14.9)  |         | 134 (10.5)  |         |
| <b>Delivery by cesarean section</b>                   |             |        |             |         |             |         |
| Yes                                                   | 103 (6.6)   | 0.006* | 356 (22.7)  | <0.001* | 218 (13.9)  | <0.001* |
| No                                                    | 280 (8.9)   |        | 1114 (35.3) |         | 717 (22.7)  |         |
| <b>Antenatal Care (ANC) visits</b>                    |             |        |             |         |             |         |
| ≤ 4                                                   | 249 (8.6)   | 0.226  | 950 (32.9)  | <0.001* | 625 (21.7)  | <0.001* |
| > 4                                                   | 125 (7.6)   |        | 436 (26.5)  |         | 263 (16.0)  |         |
| <b>Household head</b>                                 |             |        |             |         |             |         |
| Self                                                  | 40 (7.6)    | 0.017* | 150 (28.4)  | <0.001* | 99 (18.9)   | <0.001* |
| Husband                                               | 402 (9.1)   |        | 1460 (33.2) |         | 1072 (24.4) |         |
| Father                                                | 73 (8.3)    |        | 252 (28.5)  |         | 175 (19.8)  |         |
| Fathers-in-law                                        | 92 (6.4)    |        | 409 (28.6)  |         | 261 (18.2)  |         |
| Others                                                | 40 (9.9)    |        | 121 (30.2)  |         | 89 (22.2)   |         |
| <b>Respondent currently working</b>                   |             |        |             |         |             |         |
| Yes                                                   | 265 (8.6)   | 0.769  | 1057 (34.2) | <0.001* | 745 (24.1)  | <0.001* |
| No                                                    | 382 (8.4)   |        | 1335 (29.3) |         | 951 (20.9)  |         |
| <b>Father's education</b>                             |             |        |             |         |             |         |
| No education                                          | 114 (10.00) | 0.013* | 495 (43.4)  | <0.001* | 355 (31.1)  | <0.001* |
| Primary                                               | 227 (8.6)   |        | 988 (37.6)  |         | 676 (25.7)  |         |
| Secondary                                             | 215 (8.7)   |        | 687 (27.8)  |         | 497 (20.1)  |         |
| Higher                                                | 91 (6.5)    |        | 222 (15.9)  |         | 168 (12.0)  |         |
| <b>Wealth index (based on the DHS classification)</b> |             |        |             |         |             |         |
| Poorest                                               | 171 (10.0)  | 0.058  | 702 (41.1)  | <0.001* | 498 (29.1)  | <0.001* |
| Poorer                                                | 131 (8.5)   |        | 596 (38.6)  |         | 408 (26.4)  |         |

|                                  |           |        |             |         |             |         |
|----------------------------------|-----------|--------|-------------|---------|-------------|---------|
| Middle                           | 113 (8.2) |        | 426 (30.9)  |         | 300 (21.8)  |         |
| Richer                           | 127 (8.3) |        | 419 (27.4)  |         | 310 (20.3)  |         |
| Richest                          | 105 (7.1) |        | 249 (16.8)  |         | 180 (12.1)  |         |
| <b>Birth weight</b>              |           |        |             |         |             |         |
| <2500 gm                         | 32 (9.8)  | 0.076  | 137 (41.8)  | <0.001* | 107 (32.6)  | <0.001* |
| ≥ 2500 gm                        | 126 (6.9) |        | 382 (21.1)  |         | 225 (12.4)  |         |
| <b>The age group of children</b> |           |        |             |         |             |         |
| <24 months                       | 265 (8.2) | 0.389  | 900 (27.6)  | <0.001* | 570 (17.5)  | <0.001* |
| ≥ 24 months                      | 382 (8.7) |        | 1492 (33.9) |         | 1126 (25.7) |         |
| <b>Sex of child</b>              |           |        |             |         |             |         |
| Male                             | 363 (9.1) | 0.035* | 1253 (31.4) | 0.773   | 876 (21.9)  | 0.648   |
| Female                           | 284 (7.8) |        | 1139 (31.1) |         | 820 (22.4)  |         |

169 \* Significant P values

170

171 Table 3: the relationship between the nutritional state of u-5 children with young and adult

172 mothers.

| Characteristics | Unadjusted model             |         | Adjusted model <sup>a</sup>     |         |
|-----------------|------------------------------|---------|---------------------------------|---------|
|                 | Crude odds ratio<br>(95% CI) | P-value | Adjusted odds<br>ratio (95% CI) | P-value |
| <b>Wasting</b>  |                              |         |                                 |         |
| >19 years       | Reference                    |         | Reference                       |         |
| ≤19 years       | 1.3 (1.03,1.61)              | 0.024*  | 1.6 (1.02, 2.46)                | 0.039*  |
| <b>Stunting</b> |                              |         |                                 |         |
| >19 years       | Reference                    |         | Reference                       |         |
| ≤19 years       | 1.4 (1.23,1.59)              | <0.001* | 1.4 (1.09,1.78)                 | 0.008*  |

| <b>Underweight</b> |                 |         |                 |        |
|--------------------|-----------------|---------|-----------------|--------|
| >19 years          | Reference       |         | Reference       |        |
| ≤19 years          | 1.3 (1.14,1.52) | <0.001* | 1.5 (1.15,2.07) | 0.004* |

173

174 <sup>a</sup> Model adjusted for ANC visit , child birth weight, respondent currently working and type of household head

175 \* Significant P values

176

## 177 Discussion

178 This study found that 71.5% of women who gave birth for the first time were below the 19 years.

179 The prevalence of maternal age at first birth in Bangladesh aligns with the previous study in

180 Bangladesh (29). In Bangladesh, marriage at a young age is forbidden. However, it still exists

181 due to religious and societal factors, peer pressure, perceptions of girls’ gender roles, upholding

182 family honor and virginity, dowry, and concern about safety and security (31-33). According to

183 Bangladeshi civil law, girls must be 18 years to get married. In 2017; the Bangladeshi parliament

184 approved early marriage in certain situations (34). As a result, many young girls married before

185 their legal marriage age limit. In Bangladesh, 33% of young mother marriages before the age of

186 15, and 66% of young mother marriages before age the of 18 years (35). Sixty-eight percent of

187 girls had a child before twenty years of age (age 15-19 years) (36). Because of this, many women

188 have children before they were 19 years old. That has detrimental effects on raising and caring

189 for children. In USA, a study shows that experiences for young mothers on childbearing have

190 some effects on their minds, relationships, and emotions (37).

191 This research revealed that higher risk of stunting, wasting, and underweight among under-five

192 children whose mothers were age of below 19 years. According to this study, having the first

193 child at the age before 19 years puts at an elevated risk of child undernutrition, including stunting  
194 and wasting. Children of adolescent mothers are more likely to be undernourished such as  
195 shorter and underweight compare to the adult mothers (38). Young pregnant mothers are  
196 associated with undernutrition in children through poor maternal nutrition, less education, less  
197 access to health services, poor supplementary feeding practices, and substandard housing  
198 situations (12). A prospective study found that young maternal age ( $\leq 19$  years) is associated with  
199 the stunting of two years aged children (27).

200 The overall prevalence of stunting, wasting, and underweight in under-five children of young  
201 mothers is 33.7%, 9.0%, and 23.7%, respectively. Another study conducted in Bangladesh on  
202 maternal, newborn, and child health (MNCH) programs area of BRAC (a non-governmental  
203 organization) found the prevalence of stunting 15.9%, wasting 14.7%, and underweight 22.4%,  
204 respectively of the children of mother age less than nineteen years old (39). In Ghana, under-five  
205 children of young maternal age (15-19 years) are more likely to be stunted (39.0%) and wasted  
206 (8.0%) (40).

207 Current study found that children of young mothers (age below 19 years) more likely to be  
208 undernutrition than children with older mothers. These children were at least 1.4 times more  
209 likely than children of adult mothers to be underweight, stunted, and wasting. In India, a study  
210 found that young pregnancies were linked to an increased risk of undernutrition. Children of  
211 young mothers were five percentage points more likely to be stunted than children of adult  
212 mothers, and they were also shorter for their age (41).

213 In this study, it is found that mother who gave their first birth at an age below 19 years is more  
214 accountable for the undernutrition of children. A review found that mothers who gave birth at the  
215 age of before 19 years received routine medical care and immunizations for children, frequently

216 overfed or underfed their children, fewer mothers breastfed their children and they introduce  
217 solid foods in the first or second months of the infants (18). This occurs among mothers below  
218 nineteen years, who may not be able to nurture appropriately due to the lack of their maturity.  
219 Many adolescent mothers had lack of knowledge to take responsibility for maternity and infant  
220 care including prenatal care, and breastfeeding (42).  
221 Maternal age at first birth of under 19 years who get pregnant too young and leave school may  
222 feel personally unhappy if they don't have a steady source of income. Pregnant girls are  
223 frequently forced or under pressure to leave school, which might affect their chances for higher  
224 education and jobs (43). Due to the early pregnancy, they might give their kids less care,  
225 breastfeeding, and nurturing than mothers who are adults, which might translate to less care,  
226 nursing, and nurturing all around (42). Adolescent girls have been negatively impacted on their  
227 couples, families, schools, and society at large by early motherhood (42). Due to malnutrition  
228 and other growth deficiencies, this is likely to have an impact on the physical and cognitive  
229 development of their children (44).

## 230 Strengths and Weakness

231 This study analyzes nationally representative demographic and health surveys data to examine  
232 the relationship between maternal age below 19 years and undernutrition of under-five children.  
233 BDHS-17/18 data helps to generalize the relationship between the maternal age first birth and  
234 undernutrition of under-five children at the national level.  
235 We performed a cross-sectional analysis that is not appropriate for studying causal relationships  
236 but it shows that the association between the maternal age at first birth and undernutrition of  
237 under-five children. In contrast, data were collected on mothers who have given birth at the age  
238 below nineteen years using the recall procedure so that it may have some remembrance issues.

## 239 Conclusion and recommendations

240 These research results provide policymakers with vital information to implement the programs  
241 focusing on child undernutrition and younger maternal age at first birth  $\leq 19$  years. Moreover,  
242 young mother need to engage with the inclusive education to reduce the challenges of child  
243 health and nutrition. A longitudinal investigation is necessary to determine the causal connection  
244 between the maternal age at first birth and the undernutrition of under-five children.  
245 Additionally, young mothers need special program during pregnancy and the postpartum period.  
246 Moreover, a qualitative study might be helpful to understand the sociocultural factors that related  
247 with young maternal age and child undernutrition.

## 248 Acknowledgments

249 We appreciate the permission from the Bangladesh National Institute of Population Research and  
250 Training (NIPORT) and MEASURE DHS to utilize the BDHS dataset. Moreover, we specially  
251 thanks to our core donor Government of Bangladesh, and Canada for their support.

## 252 Availability of data

253 Available at: [https://dhsprogram.com/data/dataset\\_admin/index.cfm](https://dhsprogram.com/data/dataset_admin/index.cfm)

## 254 References

- 255 1. Maleta K. Undernutrition. Malawi Medical Journal. 2006;18(4).
- 256 2. Nutrition [Internet]. 2022 [cited April 2, 2022]. Available from: [https://www.who.int/health-](https://www.who.int/health-topics/nutrition)  
257 [topics/nutrition](https://www.who.int/health-topics/nutrition).
- 258 3. Malnutrition [Internet]. 2021 [cited April 2, 2022]. Available from: [https://www.who.int/news-](https://www.who.int/news-room/fact-sheets/detail/malnutrition)  
259 [room/fact-sheets/detail/malnutrition](https://www.who.int/news-room/fact-sheets/detail/malnutrition).
- 260 4. WHO. Director-General's opening remarks at the second informal member state briefing on UN  
261 Food Systems Summit. April 21, 2021 [Available from: [https://www.who.int/director-](https://www.who.int/director-general/speeches/detail/director-general-s-opening-remarks-at-the-second-informal-member-state-briefing-on-un-food-systems-summit)  
262 [general/speeches/detail/director-general-s-opening-remarks-at-the-second-informal-member-state-](https://www.who.int/director-general/speeches/detail/director-general-s-opening-remarks-at-the-second-informal-member-state-briefing-on-un-food-systems-summit)  
263 [briefing-on-un-food-systems-summit](https://www.who.int/director-general/speeches/detail/director-general-s-opening-remarks-at-the-second-informal-member-state-briefing-on-un-food-systems-summit).



- 264 5. Service WHE. ASIA HUNGER FACTS: What is the extent of hunger in Asia? [Available from:  
265 <https://www.worldhunger.org/asia-hunger-facts/>.
- 266 6. South-eastern Asia; The burden of malnutrition at a glance [Internet]. 2021 [cited April 2, 2022].  
267 Available from: <https://globalnutritionreport.org/resources/nutrition-profiles/asia/south-eastern-asia/>.
- 268 7. National Institute of Population Research and Training - NIPORT MoHaFW, and ICF. 2020.  
269 Bangladesh Demographic and Health Survey 2017-18. 2020.
- 270 8. Bangladesh; The burden of malnutrition at a glance [Internet]. 2022. Available from:  
271 <https://globalnutritionreport.org/resources/nutrition-profiles/asia/southern-asia/bangladesh/>.
- 272 9. Mark Myatt TK, Simon Schoenbuchner, Silke Pietzsch, Carmel Dolan, Natasha Lelijveld, and  
273 André Briend. Children who are both wasted and stunted are also underweight and have a high risk of  
274 death: a descriptive epidemiology of multiple anthropometric deficits using data from 51 countries.  
275 Archives of Public Health. 2018;76;28.
- 276 10. Cesar G Victora LA, Caroline Fall, Pedro C Hallal, Reynaldo Martorell, Linda Richter, Harshpal  
277 Singh Sachdev. Maternal and child undernutrition: consequences for adult health and human capital.  
278 2008.
- 279 11. Vinicius J. B. Martins TMMTF, Luciane P. Grillo, Maria Do Carmo P. Franco, Paula A. Martins, Ana  
280 Paula G. Clemente, Carla D. L. Santos, Maria de Fatima A. Vieira, Ana Lydia Sawaya. Long-Lasting Effects  
281 of Undernutrition. IJERPH. 2011;8.
- 282 12. Phuong Hong Nguyen SS, Sumanta Neupane, Lan Mai Tran, Purnima Menon. Social, biological,  
283 and programmatic factors linking adolescent pregnancy and early childhood undernutrition: a path  
284 analysis of India's 2016 National Family and Health Survey. The Lancet Child & adolescent health. 2019.
- 285 13. Organization WH. Adolescent Pregnancy Issues in Adolescent Health and Development. 2004.
- 286 14. Adolescent pregnancy [Internet]. 2023 [cited July 12, 2023]. Available from:  
287 <https://www.who.int/news-room/fact-sheets/detail/adolescent-pregnancy>.
- 288 15. Adolescents in South Asia [Internet]. 2021. Available from: [https://www.unicef.org/rosa/what-](https://www.unicef.org/rosa/what-we-do/adolescents)  
289 [we-do/adolescents](https://www.unicef.org/rosa/what-we-do/adolescents).
- 290 16. ICRW WB, editor Economic Impacts of Child Marriage: Global Synthesis Report2017.
- 291 17. Kassebaum N KH, Zoeckler L, Olsen HE, Thomas K, Pinho C, Bhutta ZA, Dandona L, Ferrari A,  
292 Ghiwot TT, Hay SI. Child and Adolescent Health From 1990 to 2015 Findings From the Global Burden of  
293 Diseases, Injuries, and Risk Factors 2015 Study. 2017.
- 294 18. Hechtman L. Teenage mothers and their children: risks and problems: a review. 1989.
- 295 19. HELEN M. DIJPLESSIS RB, TONI RICHARDS. Adolescent Pregnancy: Understanding the Age and  
296 Race on Outcomes 1997.
- 297 20. Soo Hyun Yu JM, Jennifer Crum, Claudia Cappa, David R. Hotchkiss. Differential effects of young  
298 maternal age on child growth. 2016.
- 299 21. Organization WH. Adolescent pregnancy situation in South-East Asia Region. 2014.
- 300 22. Organization WH. Preventing early pregnancy and poor reproductive outcomes among  
301 adolescents in developing countries: what the evidence says. 2011.
- 302 23. Organization WH. Women and health : today's evidence tomorrow's agenda. 2009.
- 303 24. Heather L. Sipsma UM, Anna Divney, Derrick Gordon, Elizabeth Gabzdyl, Trace Kershaw.  
304 Breastfeeding behavior among adolescents: Initiation, duration, and exclusivity. 2013.
- 305 25. T K LeGrand CSM. Teenage Pregnancy and Child Health in the Urban Sahel. 1993.
- 306 26. Srinivas Goli AR, Deepti Singh. The Effect of Early Marriages and Early Childbearing on Women's  
307 Nutritional Status in India. 2015.
- 308 27. Fall CH SH, Osmond C, Restrepo-Mendez MC, Victora C, Martorell R, Stein AD, Sinha S, Tandon  
309 N, Adair L, Bas I, Norris S, Richter LM; COHORTS investigators. Association between maternal age at  
310 childbirth and child and adult outcomes in the offspring: a prospective study in five low-income and  
311 middle-income countries (COHORTS collaboration). Lancet Glob Health. 2015.

- 312 28. Tahmeed Ahmed MH, Kazi Istiaque Sanin, . Global Burden of Maternal and Child Undernutrition  
313 and Micronutrient Deficiencies *Annals of nutrition & metabolism*. 2013;61:8-17.
- 314 29. Phuong Hong Nguyen SS, Long Quynh Khuong, Priyanjana Pramanik, Akhter Ahmed, Sabina Faiz  
315 Rashid, Kaosar Afsana, and Purnima Menon. Adolescent birth and child undernutrition: an analysis of  
316 demographic and health surveys in Bangladesh, 1996–2017. *Annals of the New York Academy of*  
317 *Sciences*. 2021.
- 318 30. WHO. *The WHO Child Growth Standards*. 2010.
- 319 31. Chowdhury FD. The socio-cultural context of child marriage in a Bangladeshi village.  
320 *International Journal of Social Welfare*. 2004;13(3):244-253.
- 321 32. Elizabeth G Henry NBL, Ashraf Al Alam, Nabeel Ashraf Ali, Emma K Williams, Syed Moshfiqur  
322 Rahman, Salahuddin Ahmed, Shams El Arifeen, Abdullah H Baqui, Peter J Winch. Sociocultural factors  
323 perpetuating the practices of early marriage and childbirth in Sylhet District, Bangladesh. 2015.
- 324 33. Rahman M. Determinates of early marriage in Bangladesh: An evidence of the nationally  
325 representative survey. *International Journal of Sociology and Anthropology*. 2017.
- 326 34. WATCH HW. Bangladesh: Legalizing Child Marriage Threatens Girls' Safety Contain Harm with  
327 Strict Regulations. 2017 [Available from: [https://www.hrw.org/news/2017/03/02/bangladesh-legalizing-](https://www.hrw.org/news/2017/03/02/bangladesh-legalizing-child-marriage-threatens-girls-safety)  
328 [child-marriage-threatens-girls-safety](https://www.hrw.org/news/2017/03/02/bangladesh-legalizing-child-marriage-threatens-girls-safety)].
- 329 35. Matera B. New Bangladesh marriage law is blow to children's and women's rights. 2014.
- 330 36. Mohammad Mainul Islam MKI, Mohammad Sazzad Hasan, Mohammad Bellal Hossain.  
331 Adolescent motherhood in Bangladesh:Trends and determinants. 2017.
- 332 37. Mollborn S. *Teenage Mothers Today: What We Know and How It Matters*. 2016.
- 333 38. Phuong Hong Nguyen SS, Sumanta Neupane, Lan Mai Tran, Purnima Menon. Social, biological,  
334 and programmatic factors linking adolescent pregnancy and early childhood undernutrition: a path  
335 analysis of India's 2016 National Family and Health Survey. *The Lancet Child & Adolescent Health*.  
336 2019;3(7):P463-73.
- 337 39. Phuong Hong Nguyen TS, Lan Mai Tran, Kaosar Afsana, Zeba Mahmud, Bachera Aktar, Raisul  
338 Haque, Purnima Menon. The nutrition and health risks faced by pregnant adolescents: Insights from a  
339 cross-sectional study in Bangladesh. *PLoS ONE*. 2017.
- 340 40. Anthony Wemakor HG, Thomas Azongo, Helene Garti, Ambrose Atozona. Young maternal age is  
341 a risk factor for child undernutrition in Tamale Metropolis, Ghana. *BMC research notes*. 2018.
- 342 41. Bhan N. Preventing teenage pregnancy in India to end the cycle of undernutrition. *The Lancet*.  
343 2019;3.
- 344 42. Massoumeh Mangeli MR, Mohammad Ali Cheraghi, and Batool Tirgari,. Exploring the Challenges  
345 of Adolescent Mothers From Their Life Experiences in the Transition to Motherhood: A Qualitative  
346 Study. *J Family Reprod Health*. 2017.
- 347 43. Early childbearing [Internet]. 2022. Available from: [https://data.unicef.org/topic/child-](https://data.unicef.org/topic/child-health/adolescent-health/)  
348 [health/adolescent-health/](https://data.unicef.org/topic/child-health/adolescent-health/).
- 349 44. THE CHANGING FACE OF MALNUTRITION: THE STATE OF THE WORLD'S CHILDREN 2019  
350 [Internet]. [cited 31 July 2023]. Available from: [https://features.unicef.org/state-of-the-worlds-children-](https://features.unicef.org/state-of-the-worlds-children-2019-nutrition/)  
351 [2019-nutrition/](https://features.unicef.org/state-of-the-worlds-children-2019-nutrition/).

352

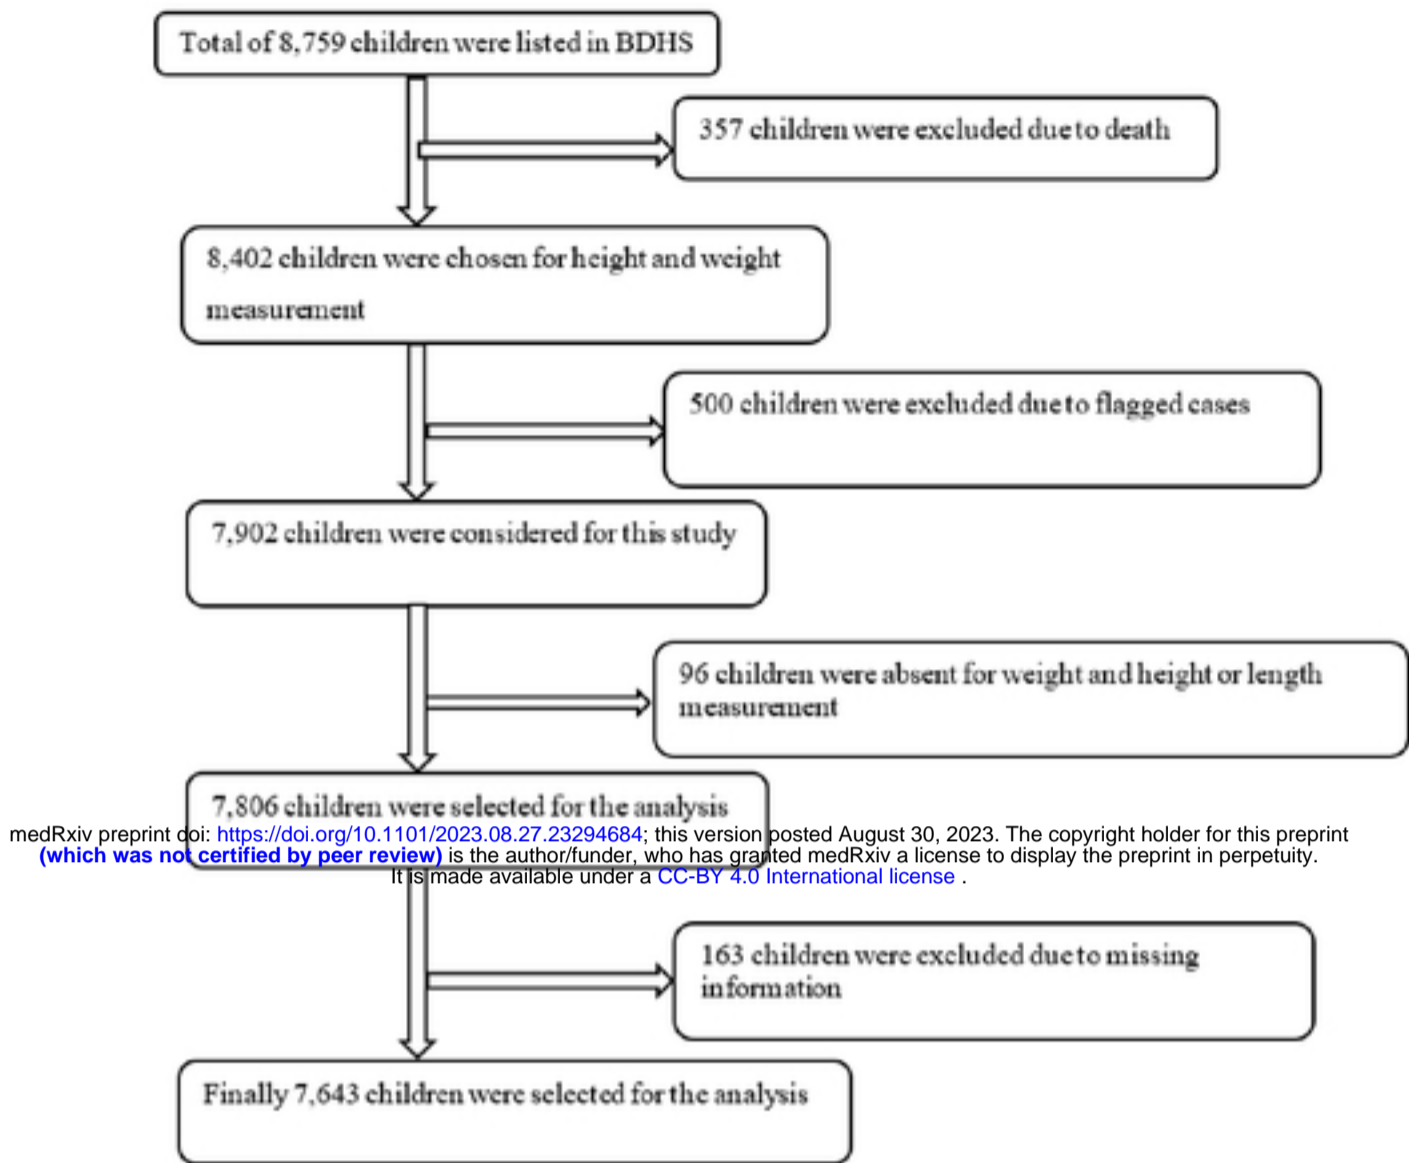

**Fig. 1. Sampling flow chart for the selection of the participants**

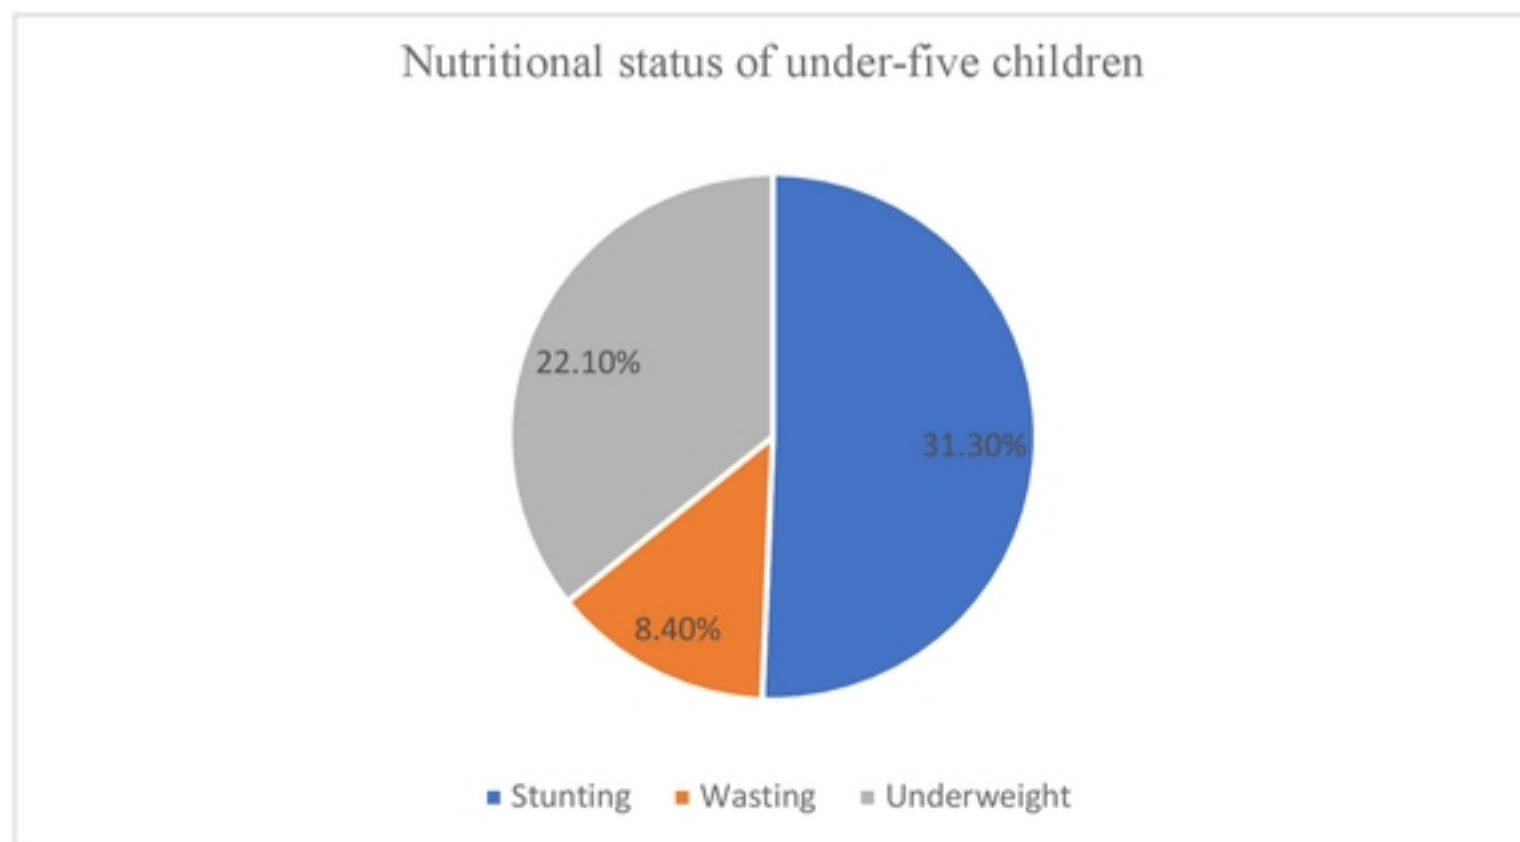

**Fig. 2: Percentage of undernutrition of under-five children**
